# Supplementary material for: Electrocatalytic reduction of nitrogen to ammonia under ambient conditions using a nanorod-structured MoN catalyst
Source: Royal Society of Chemistry journal article supplement (doi:10.1039/d0nj04244g), 2020-01-01
Supplement: d0nj04244g1.pdf [file d0nj04244g1.pdf]

## *Supporting Information for*

### Electrocatalytic reduction of nitrogen to ammonia under ambient conditions using nanorod-structured MoN catalyst

Guoqiang Liu<sup>a†\*</sup>, Cuijiao Zhao<sup>b†</sup>, Shimin Ding<sup>c</sup>

<sup>a</sup> *School of Materials Science and Engineering, Hefei University of Technology, Hefei, Anhui, 230009, PR China.*

<sup>b</sup> *CAS Center for Excellence in Nanoscience, Institute of Solid State Physics, Chinese Academy of Sciences, Hefei 230031, China.*

<sup>c</sup> *Green Intelligence Environment School, Yangtze Normal University, Chongqing 408100, PR China.*

<sup>†</sup> *These authors contributed equally to this work.*

<sup>\*</sup> *Corresponding author: [gqliu@issp.ac.cn](mailto:gqliu@issp.ac.cn)*

**Table S1.** A summary of the recently reported Mo-based NRR electrocatalysts.

| <i>Catalyst</i>                                 | <i>Conditions</i>                     | <i>FE (%)</i> | <i>NH<sub>3</sub> Yield Rate</i>                                                        | <i>Ref.</i> |
|-------------------------------------------------|---------------------------------------|---------------|-----------------------------------------------------------------------------------------|-------------|
| Mo nanofilm                                     | 0.01 M H <sub>2</sub> SO <sub>4</sub> | 0.72          | 3.09×10 <sup>-11</sup> mol s <sup>-1</sup> cm <sup>-2</sup>                             | 1           |
| Mo <sub>2</sub> C/C                             | 0.5 Li <sub>2</sub> SO <sub>4</sub>   | 7.8           | 11.3 μg h <sup>-1</sup> mg <sup>-1</sup> <sub>Mo<sub>2</sub>C</sub>                     | 2           |
| MoS <sub>2</sub> /C <sub>3</sub> N <sub>4</sub> | 0.1 M LiClO <sub>4</sub>              | 17.8          | 18.5 μg h <sup>-1</sup> mg <sup>-1</sup>                                                | 3           |
| MoO <sub>2</sub> /graphene                      | 0.1 M Na <sub>2</sub> SO <sub>4</sub> | 6.6           | 37.4 μg h <sup>-1</sup> mg <sup>-1</sup>                                                | 4           |
| defect-rich MoS <sub>2</sub>                    | 0.1 M Na <sub>2</sub> SO <sub>4</sub> | 8.34          | 29.28 μg h <sup>-1</sup> mg <sup>-1</sup> <sub>cat.</sub>                               | 5           |
| MoS <sub>2</sub>                                | 0.1 M Na <sub>2</sub> SO <sub>4</sub> | 1.17          | 8.08×10 <sup>-11</sup> mol s <sup>-1</sup><br>cm <sup>-1</sup>                          | 6           |
| MoS <sub>2</sub> /RGO                           | 0.1 M Na <sub>2</sub> SO <sub>4</sub> | 27.93         | 16.41 μg h <sup>-1</sup> mg <sub>cat.</sub> <sup>-1</sup>                               | 7           |
| MoN                                             | 0.1 M HCl                             | 1.15          | 3.01×10 <sup>-10</sup> mol s <sup>-1</sup><br>cm <sup>-2</sup>                          | 8           |
| Mo <sub>2</sub> N                               | 0.1 M HCl                             | 4.5           | 78.4 μg h <sup>-1</sup> mg <sub>cat.</sub> <sup>-1</sup>                                | 9           |
| Bi <sub>2</sub> MoO <sub>6</sub>                | 0.1 M HCl                             | 8.17          | 20.46 μg h <sup>-1</sup> mg <sup>-1</sup> <sub>cat.</sub>                               | 10          |
| MoO <sub>3</sub>                                | 0.1 M HCl                             | 1.9           | 29.43 mg h <sup>-1</sup> mg <sub>cat.</sub> <sup>-1</sup>                               | 11          |
| MoO <sub>3-x</sub>                              | 0.1 M KOH                             | 12.01         | 35.83 ug h <sup>-1</sup> mg <sup>-1</sup> <sub>cat</sub>                                | 12          |
| MoN                                             | 0.1 M KOH                             | 12.84         | 6.31 μmol h <sup>-1</sup> cm <sup>-2</sup><br>107.3 μg h <sup>-1</sup> cm <sup>-2</sup> | This Work   |

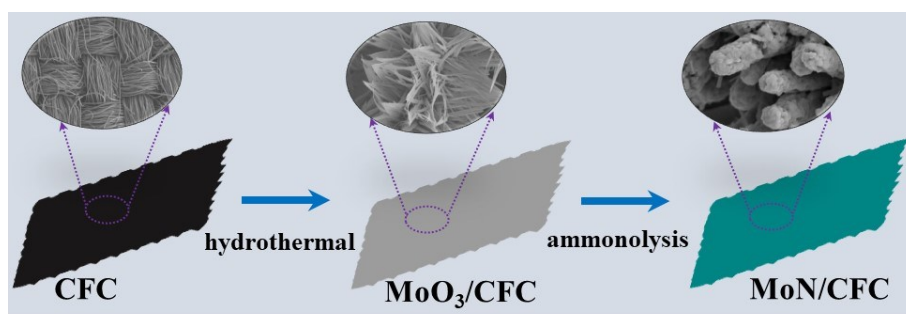

**Fig. S1** Schematic illustration for preparing of MoN/CFC electrocatalyst

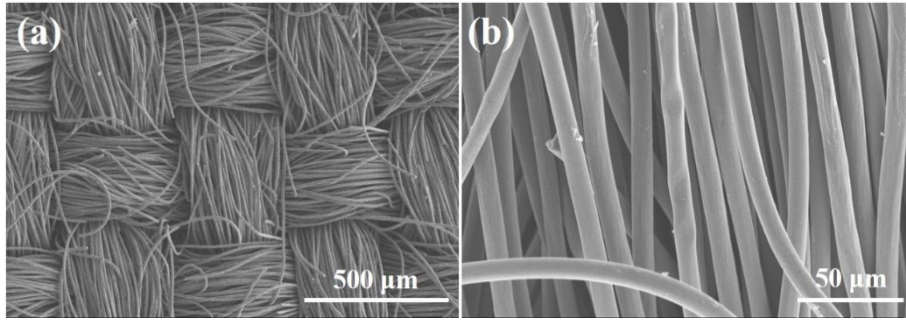

**Fig. S2** (a) Low- and (b) high-magnification SEM images of CFC.

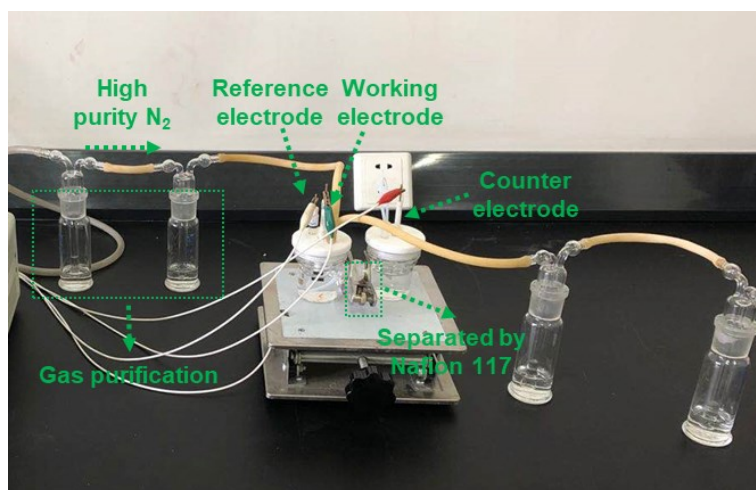

**Fig. S3** Schematic diagram for electrocatalytic NRR.

A representative digital photo of NRR device is provided in Fig. S3, which includes gas-tight two-compartment cell and gas purification system. The gas-tight two-compartment is separated by Nafion 117 and integrated with a three-electrode system. In addition, the experiment is implemented under 0.1 M KOH electrolyte after depurating feedstock of Ar or N<sub>2</sub> to eliminate the potentially mixed NH<sub>3</sub> and NO<sub>x</sub> through 0.05 M H<sub>2</sub>SO<sub>4</sub> and deionized water successively.

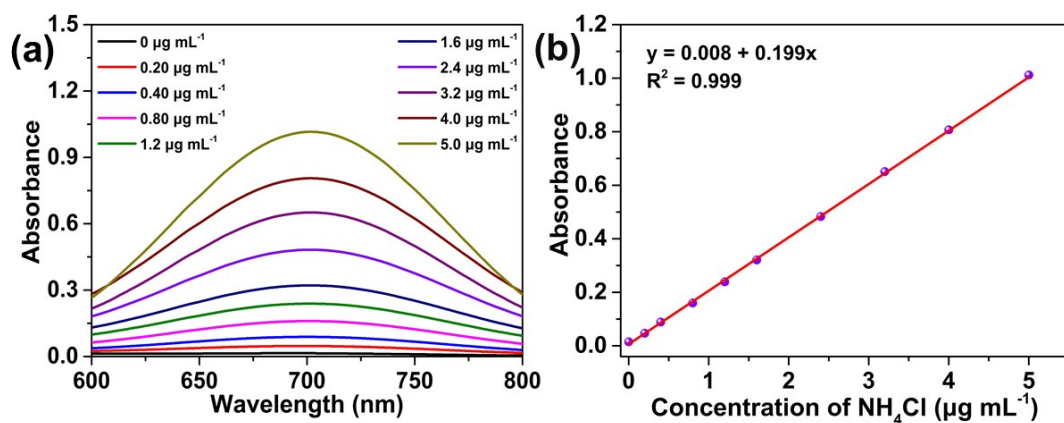

**Fig. S4** (a) UV-Vis absorbance spectra of the indophenol blue indicator under different concentrations of  $\text{NH}_4^+$  ions after incubating for 1 h at room temperature in 0.02 M of KOH, (b) Calibration curve derived from the absorbance at wavelength of 700 nm as a function of the various concentrations of  $\text{NH}_4^+$ .

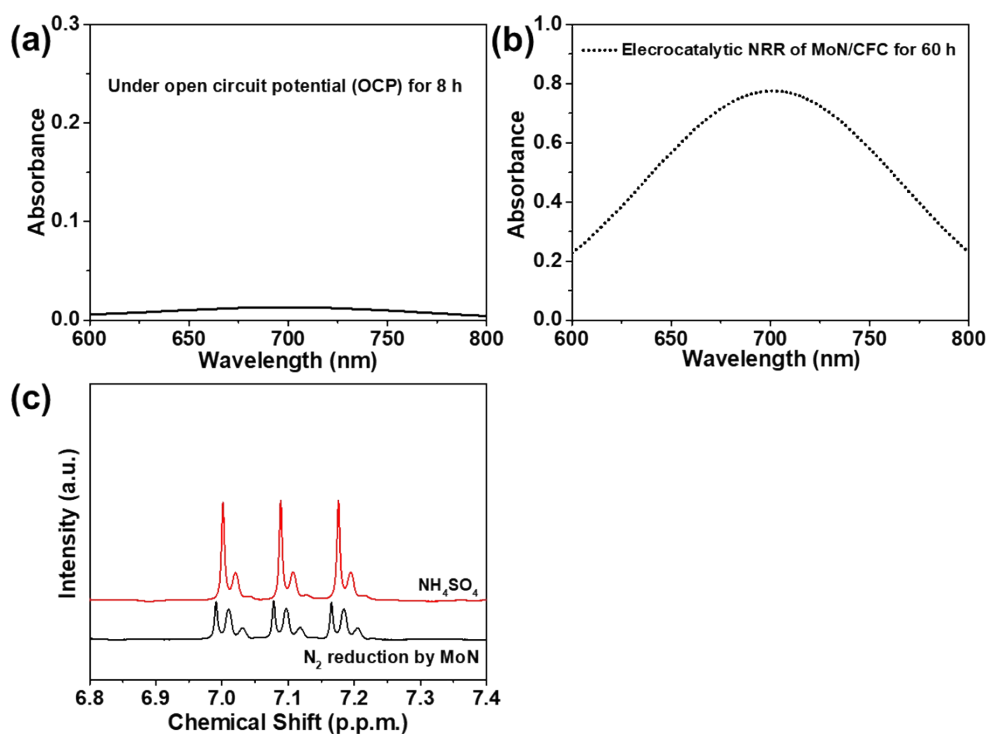

**Fig. S5** (a) UV-Vis absorption spectra of electrochemical NRR under OCP for 8 h, (b) UV-Vis absorption spectra of electrocatalysis toward NRR for 60 h, (c) NMR (nuclear magnetic resonance) spectra of electrocatalytic NRR with MoN/CFC as working electrode.

For indophenol blue indicator to detect the product from NRR, 0.1 ml of electrolyte was firstly diluted to 10 ml by deionized water and then successively mixed with 0.5 ml of 0.55 M NaOH solution (containing 5.0 wt% of  $\text{C}_7\text{H}_6\text{O}_3$  and 5.0 wt% of sodium citrate), 100  $\mu\text{L}$  of  $\text{C}_5\text{FeN}_6\text{Na}_2\text{O}$  ( $10 \text{ g L}^{-1}$ ), and 100  $\mu\text{L}$  of 0.05 M NaClO. After aging for 1 h at room temperature, absorbance of the above mixture was reported at wavelength of 700 nm. Based on calibration curve in Fig. S4, the yield of the  $\text{NH}_3$  was calculated to be 216.2  $\mu\text{mol}$ , suggesting the accumulation of the generation  $\text{NH}_3$ .

For NMR to evaluate the product of NRR, the original electrolyte (30 ml of 0.1 M KOH) was acidified by adding of 0.2 M of  $\text{H}_2\text{SO}_4$  (30 ml) and next concentrated to 2 ml *via* evaporation of water in an oven. Then 0.6 ml of the electrolyte and 0.2 ml of  $\text{D}_2\text{O}$  were mixed and shaken to obtain homogeneous solution. The acidified electrolyte with abundant hydrogen ions results in the splitting of NMR spectra.

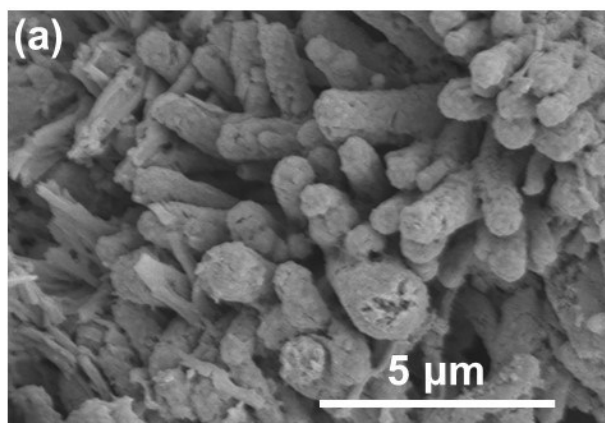

**Fig. S6** SEM image of MoN/CFC electrode after long-term electrolysis toward NRR.



## Reference

- [1] Dashuai Yang, Ting Chen, Zhijiang Wang, *J. Mater. Chem. A*, 2017, 5, 18967–18971.
- [2] Hui Cheng, Liang-Xin Ding, Gao-Feng Chen, Lili Zhang, Jian Xue, Haihui Wang, *Adv. Mater.*, 2018, 30, 1803694.
- [3] Ke Chu, Ya-ping Liu, Yu-biao Li, Ya-li Guo, Ye Tian, *ACS Appl. Mater. Interfaces*, 2020, 12, 7081–7090.
- [4] Jing Wang, Ya-ping Liu, Hu Zhang, Da-jian Huang, Ke Chu, *Catal. Sci. Technol.*, 2019, 9, 4248–4254.
- [5] Xianghong Li, Tingshuai Li, Yongjun Ma, Qin Wei, Weibin Qiu, Haoran Guo, Xifeng Shi, Peng Zhang, Abdullah M. Asiri, Liang Chen, Bo Tang, Xuping Sun, *Adv. Energy Mater.*, 2018, 8, 1801357.
- [6] Ling Zhang, Xuqiang Ji, Xiang Ren, Yongjun Ma, Xifeng Shi, Ziqi Tian, Abdullah M. Asiri, Liang Chen, Bo Tang, Xuping Sun, *Adv. Mater.*, 2018, 30, 1800191.
- [7] Yanyan Liu, Weikang Wang, Shengbo Zhang, Wenyi Li, Guozhong Wang, Yunxia Zhang, Miaomiao Han, Haimin Zhang, *ACS Sustainable Chem. Eng.*, 2020, 8, 2320–2326.
- [8] Ling Zhang, Xuqiang Ji, Xiang Ren, Yonglan Luo, Xifeng Shi, Abdullah M. Asiri, Baozhan Zheng, Xuping Sun, *ACS Sustainable Chem. Eng.*, 2018, 6, 9550–9554.
- [9] Xiang Ren, Guanwei Cui, Liang Chen, Fengyu Xie, Qin Wei, Ziqi Tian, Xuping Sun, *Chem. Commun.*, 2018, 54, 8474–8477.

- [10] Zhe Xing, Wenhan Kong, Tongwei Wu, Hongtao Xie, Ting Wang, Yonglan Luo, Xifeng Shi, Abdullah M. Asiri, Yanning Zhang, Xuping Sun, *ACS Sustainable Chem. Eng.*, 2019, 7, 12692–12696.
- [11] Jingrui Han, Xuqiang Ji, Xiang Ren, Guanwei Cui, Lei Li, Fengyu Xie, Hui Wang, Baihai Li, Xuping Sun, *J. Mater. Chem. A*, 2018, 6, 12974–12977.
- [12] Wei Liu, Chong Li, Qun Xu, Pengfei Yan, Chunyao Niu, Yonglong Shen, Pengfei Yuan, Yu Jia, *ChemCatChem*, 2019, 11, 1–6.
